# Supplementary material
Source: PubMed Central journal article supplement (PMC8207522)
Supplement: NIHMS1704687-supplement-Supplemental_Figure_1.pdf [file NIHMS1704687-supplement-Supplemental_Figure_1.pdf]

S1. Single bolus injection, 3 days post

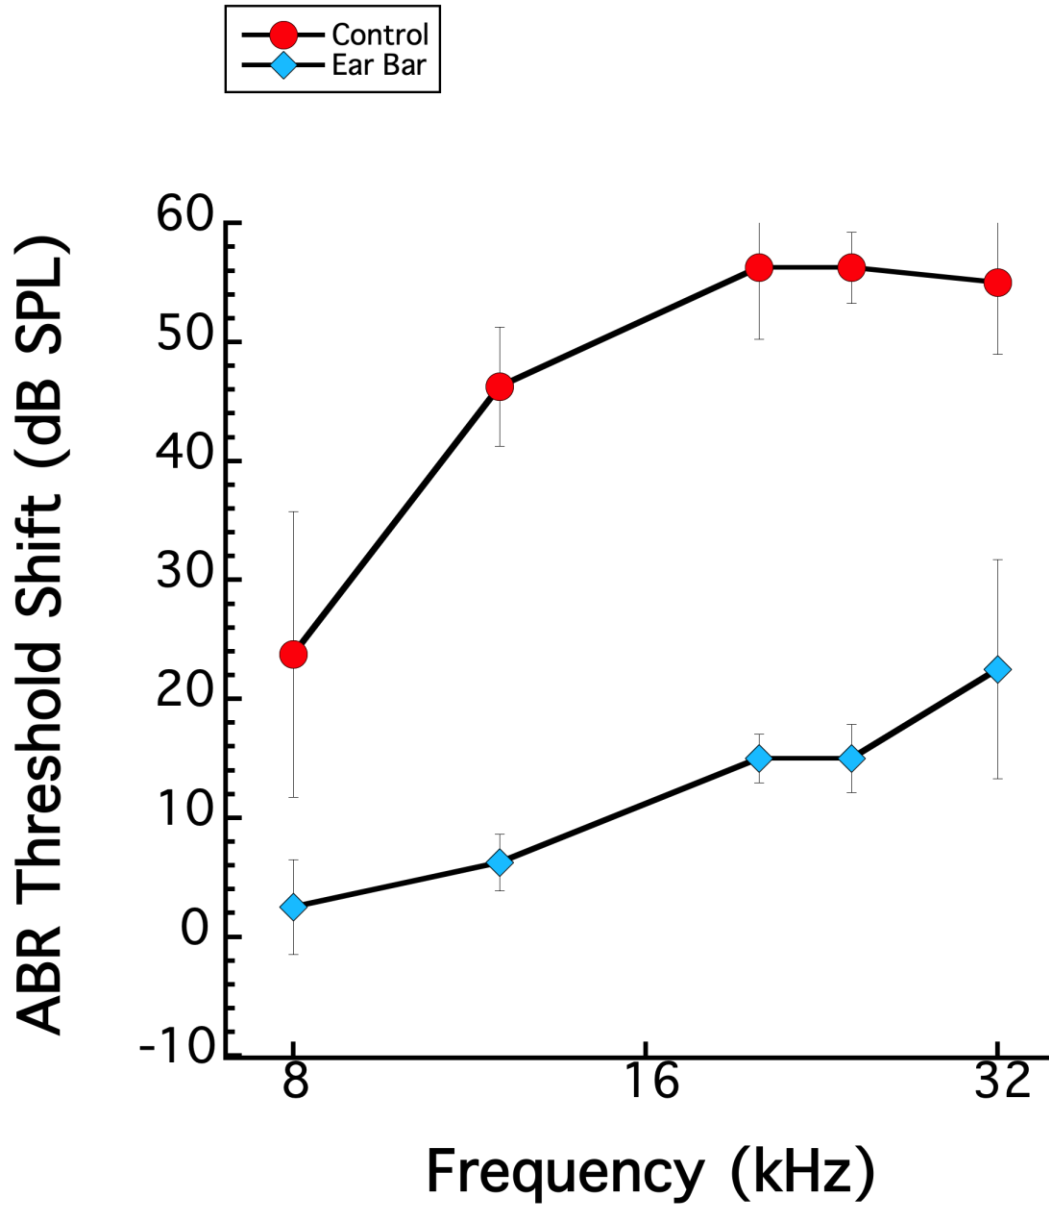

Supplemental Figure 1. Single Bolus Injection, 3 Days Post. Sham control (cisplatin only 12 mg/kg, red circles) were compared to ears cooled via ear bar. Significant protection was observed. Error bars show standard error of the mean (SEM).
