# Supplementary material
Source: PubMed Central journal article supplement (PMC8207522)
Supplement: NIHMS1704687-supplement-Supplemental_Figure_2.pdf [file NIHMS1704687-supplement-Supplemental_Figure_2.pdf]

S2. Contralateral ear after repeated dosing

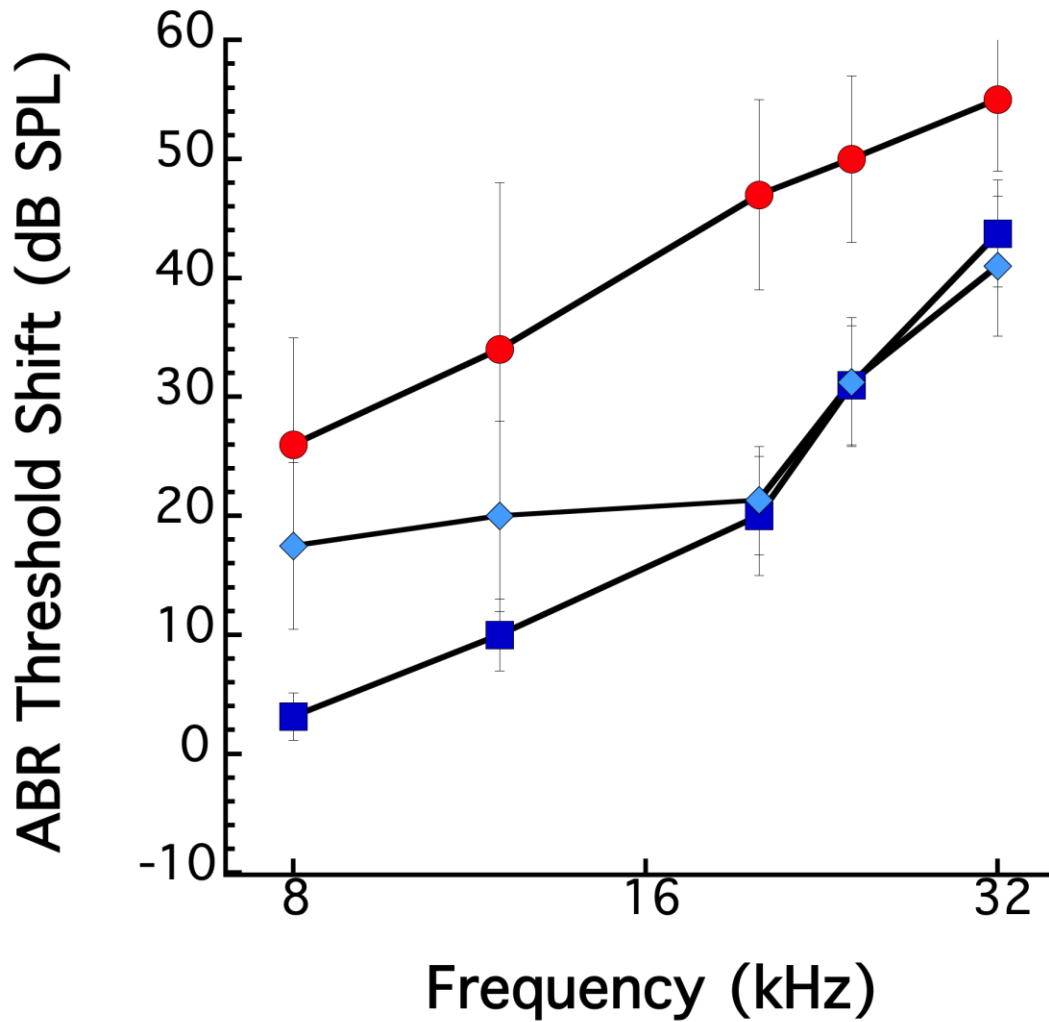

Supplemental Figure 2. Contralateral Ear after Repeated Doses, 1 Month Post. Significant threshold shift was observed for all groups, with minimal protection observed in the cooled ears (dark blue squares = cool water; light blue diamonds = cool ear bar; red circles = cisplatin only). Error bars show standard error of the mean (SEM).
